# Supplementary material
Source: PubMed Central journal article supplement (PMC10387127)
Supplement: NIHMS1869521-supplement-tS1.pdf [file NIHMS1869521-supplement-tS1.pdf]

**Table S1:** The number of pre-operative complications related to poor outcome amongst the three groups of horses.

|                                     | <b>Heart rate (&gt;40 bpm)</b> | <b>Increased PCV &gt;48%</b> | <b>Increased systemic lactate &gt;2 mmol/L</b> | <b>Increased systemic total protein &gt;80 g/L</b> | <b>Increased CK &gt;470 IU/L</b> | <b>&gt;2L of reflux</b> | <b>Increased peritoneal lactate &gt;4 mmol/L</b> | <b>Increased peritoneal protein &gt;20 g/L</b> |
|-------------------------------------|--------------------------------|------------------------------|------------------------------------------------|----------------------------------------------------|----------------------------------|-------------------------|--------------------------------------------------|------------------------------------------------|
| <i>Euthanised Intra-operatively</i> | 11                             | 2                            | 8                                              | 1                                                  | 8                                | 1                       | 9                                                | 6                                              |
| <i>Euthanised post-operatively</i>  | 3                              | 1                            | 1                                              | 0                                                  | 5                                | 4                       | 3                                                | 0                                              |
| <i>Survived to discharge</i>        | 16                             | 2                            | 12                                             | 3                                                  | 8                                | 9                       | 7                                                | 7                                              |
