# Supplementary material
Source: PubMed Central journal article supplement (PMC10387127)
Supplement: NIHMS1869521-supplement-tS2.pdf [file NIHMS1869521-supplement-tS2.pdf]

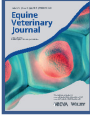

**Table S2:** The number of post operative complications amongst the three groups of horses.

|                                    | <b>Laminitis</b> | <b>Fever</b> | <b>&gt;2L reflux</b> | <b>Diarrhoea</b> | <b>Tachycardia</b> | <b>Placed on TPN</b> | <b>2<sup>nd</sup> surgery</b> |
|------------------------------------|------------------|--------------|----------------------|------------------|--------------------|----------------------|-------------------------------|
| <i>Euthanised post-operatively</i> | 0                | 1            | 4                    | 0                | 3                  | 0                    | 0                             |
| <i>Survived to discharge</i>       | 0                | 6            | 9                    | 5                | 12                 | 1                    | 4                             |
